# Supplementary material for: Study of Arsenic Sulfide in Solid Tumor Cells Reveals Regulation of Nuclear Factors of Activated T-cells by PML and p53
Source: PubMed Central journal article supplement (PMC4726130; doi:10.1038/srep19793), 2016-01-22
Supplement: srep19793-s1.pdf [file srep19793-s1.pdf]

# **Study of Arsenic Sulfide in Solid Tumor Cells Reveals Regulation of Nuclear Factors of Activated T-cells by PML and p53**

Wenping Ding<sup>1\*</sup>, Yingying Tong<sup>1\*</sup>, Xiuli Zhang<sup>1</sup>, Mingguai Pan<sup>2,3</sup>, Siyu Chen<sup>1</sup>

<sup>1</sup>Department of Oncology, Xin Hua Hospital Affiliated to Shanghai Jiao Tong University School of Medicine, Shanghai, China

<sup>2</sup>Department of Oncology and Hematology, Kaiser Permanente Medical Center, Santa Clara, CA, and <sup>3</sup>Kaiser Permanente Division of Research, Oakland, CA, USA

Address correspondence to: Siyu Chen, Department of Oncology, Xin Hua Hospital Affiliated to Shanghai Jiao Tong University School of Medicine, Shanghai 200092, China, Phone +86-21-25077642

email: [siyu.chen@shsmu.edu.cn](mailto:siyu.chen@shsmu.edu.cn)

or Mingguai Pan, Department of Oncology and Hematology, Kaiser Permanente Medical Center, 710 Lawrence Expressway, Santa Clara, CA 95051, USA

Phone: 1 408 851 4306

email: [minggui.pan@kp.org](mailto:minggui.pan@kp.org)

## **Supplemental Information**

## Materials and Methods

The oligonucleotide primers used for RT-PCR are as follows:

GAPDH: F (forward): 5'-ggcacagtcaaggctgagaatg-3'

R (reverse): 5'-atggtggtgaagacgccagta-3'

c-Myc:

F: 5'-cctccactcggaggactatc-3'

R: 5'-tgttcgctcttgacattctc-3'

NFATc1:

F: 5'-ggagatggaagcgaaaactg-3'

R: 5'-gcgggaaggtaggtgaaac-3'

NFATc2:

F: 5'-cacggggcagaactttacat-3'

R: 5'-ctgggactgggtgtagta-3'

NFATc3:

F: 5'-cacaccacttgcttaccacat-3'

R: 5'-ccgttctgggtcatttatctgt-3'

NFATc4:

F: 5'-cttccttcccagagtgatg-3'

R: 5'-accttctccagcgtgatac-3'

PML:

F: 5'-agcacctccaaggcagtct-3'

R: 5'-gagtttctggcatctgagtctt-3'

The shRNA and siRNA sequences:

For p53, 5'-GACTCCAGTGGTAATCTAC-3';

for NFATc2, 5'-GCCCATGGTTGAAAGACAAGA-3';

for NFATc3, 5'-GCCAGATGATTGTGCATCCAT-3';

for control, 5'-TTCTCCGAACGTGTCACGT-3'.

The sequence of siRNA for PML (siPML): 5'- ATACAACGACAGCCCAGAA-3'; and

for negative control: 5'-TGAAGGAGTTCCTGATCTTTT-3'.

ChIP primers for NFATc2 and c-Myc promoter:

Ten sets of primers were designed to cover the NFATc2 promoter from -2760 to +220 from the transcription start site (TSS).

F1: 5'-GCCCCTGCCTTAGTGGATCTC-3'

R1: 5'-GGAGAAAAGCTAGGAATGCCT-3'

F2: 5'-AGGCATTCCTAGCTTTTCTCC-3'

R2: 5'- CTCAGGAATCATTTCAGAGTC-3'

F3: 5'- GACTCTGAAATGATTCCTGAG-3'

R3: 5'- TCCCTTCATCATGCTTATGCC-3'

F4: 5'-GGCATAAGCATGATGAAGGGA-3'

R4: 5'-TTAGTAGAGATGGGGTTTTG-3'

F5: 5'-GGGCGTGGTGGCTCACACCTG-3'

R5: 5'-CCC ACTGAAGCAGAATTCCTA-3'

F6: 5'-TAGGAATTCTGCTTCAGTGGG-3'

R6: 5'-TAAGTCTGAATACAGACTCGT-3'

F7: 5'-ACGAGTCTGTATTCAGACTTA-3'

R7: 5'-TCTGCTTATGGGGCCAGGAGA-3'

F8: 5'-TCTCCTGGCCCCATAAGCAGA-3'

R8: 5'-CCATGGGGTGGGAAGGGGTAT-3'

F9: 5'-ATACCCCCTTCCACCCCATGG-3'

R9: 5'-CGTGGAGGCGGGGACAGGGCG-3'

F10: 5'-CGCCCTGTCCCCGCCTCCACG-3'

R10: 5'-CGGGAAGGCTGCGGGGCCGG-3'

Ten sets of primers were designed to cover the c-Myc promoter from -2528 to +525 from the TSS:

F1 : CTTTGATTGTGCCACTGCACT

R1 : TCACCACTGCTAATGAACATC

F2 : GATGTTCAATTAGCAGTGGTGA

R2 : TGGGCAGCACCCGCGTTCAGG

F3 : CCTGAACGCGGGTGCTGCCCA

R3 : CCAAAGGCATTTTAAGTAAAC

F4 : GTTTACTTAAAATGCCTTTGG

R4 : GGAGTCTTGAGCTAATTAATA

F5 : TTTTAATTAGCTCAAGACTCC

R5 : TTTGGGAGAAATCAAAGGTGC

F6 : GCACCTTTGATTTCTCCCAA

R6 : TCTGGATTGGATACCTTCCAC

F7 : GTGGAAGGTATCCAATCCAGA

R7 : CCACGCGCGTACCAGGCTGCA

F8 : TGCAGCCTGGTACGCGCGTGG

R8 : GCGCTTATGGGGAGGGTGG

F9 : CCACCCTCCCCATAAGCGCC

R9 : CGCTCGCTCCCTCTGCCTCT

F10 : AGAGGCAGAGGGAGCGAGCG

R10 : CGTCTAAGCAGCTGCAAGGAG

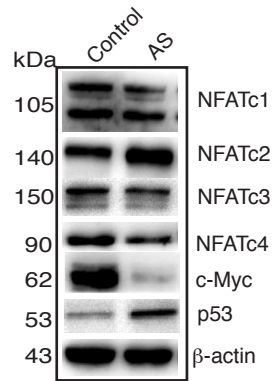

**Figure S1: AS modulates NFAT, c-Myc and p53 expression in AGS cells.**  
Western blot of NFATc1-4, c-Myc and p53 after 1.0  $\mu$ M AS treatment for 24 hours.  
 $\beta$ -actin as loading control.

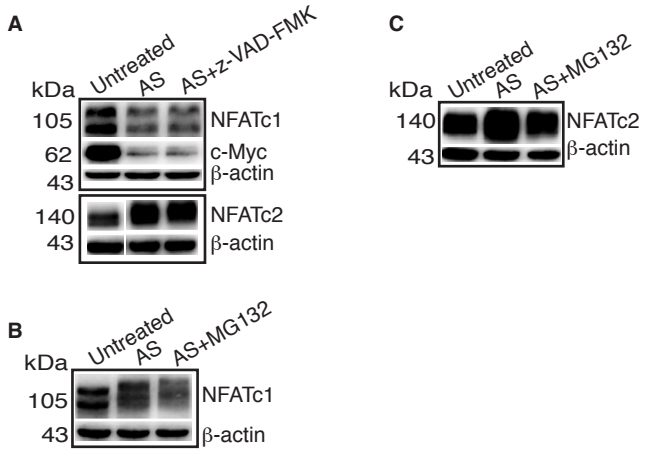

**Figure S2: Impact of caspase inhibitor and proteasome inhibitor on NFATc1 and NFATc2.**

**A.** z-VAD-FMK is a pan-caspase inhibitor and showed no impact on the effect of AS on NFATc1, NFATc2 or c-Myc. **B.** MG132 is a proteasome inhibitor, it did not impact the AS inhibition on NFATc1. **C.** MG132 blocked the AS stimulation of NFATc2. kDa, molecular weight.

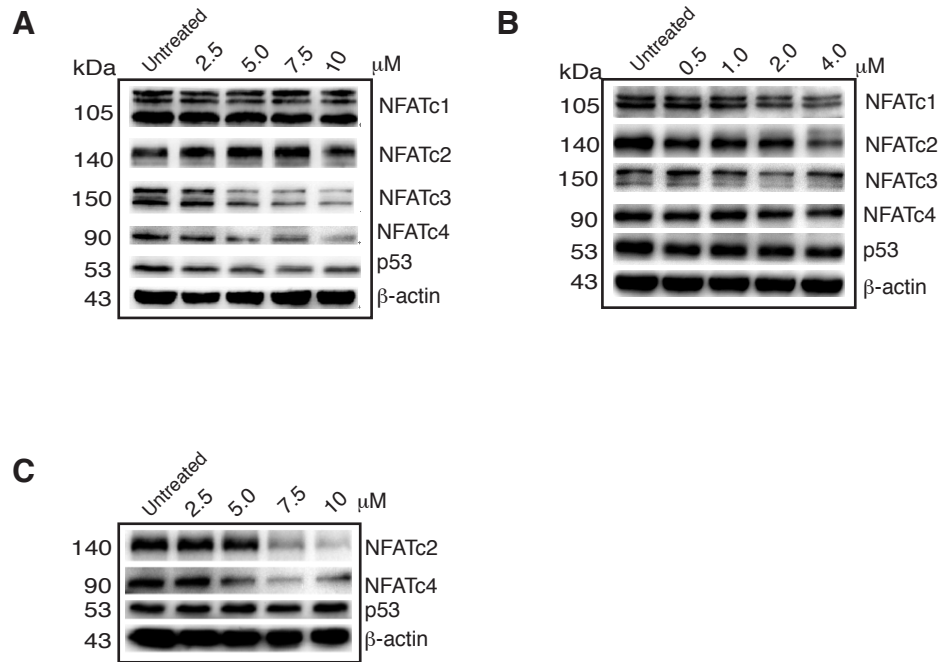

**Figure S3: AS modulates NFATc1, c2, c3 and c4 (NFATc1-4) in other solid tumor cells.**

**A.** Western blot of NFATc1-4 and p53 after AS treatment of SW480 colon cancer cells for 24 hours with indicated AS concentration. **B.** Western blot of NFATc1-4 and p53 after AS treatment of MGC803 gastric cancer cells for 24 hours. **C.** Western blot of NFATc2, NFATc4 and p53 after AS treatment of Panc-1 pancreatic cancer cells for 24 hours. AS concentration in  $\mu\text{M}$ .  $\beta$ -actin as loading control.



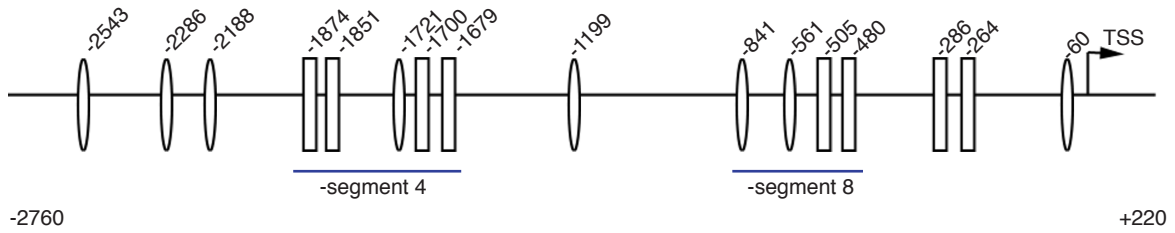

**Figure S4: Putative p53 binding sites on the NFATc2 promoter region from -2760 to +220.** TSS, transcription start site; Ovals indicate the locations of pentanucleotides (TGCCC or TGTCC); Rectangles indicate the locations of the putative p53 responsive elements (PREs). The approximate positions of segment 4 and 8 are indicated (see Fig. 5D).

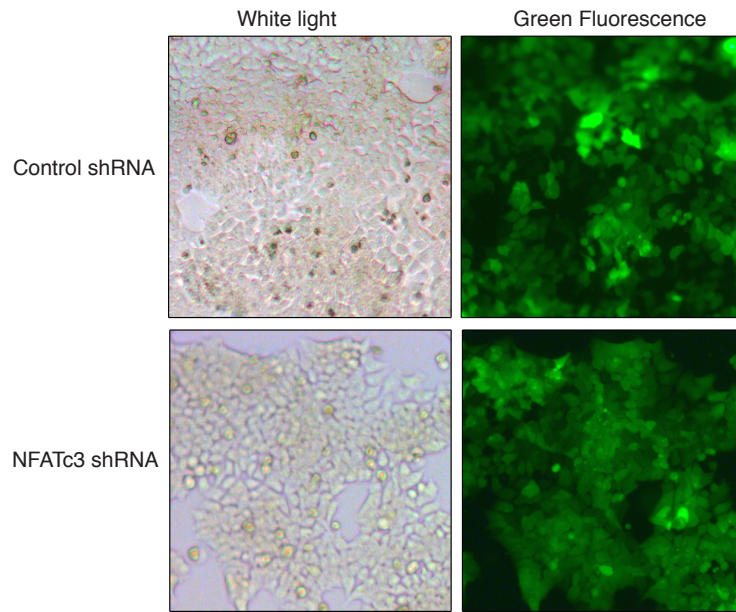

**Figure S5. Monitoring shRNA-containing lentivirus infection efficiency by GFP expression**

| AS and CsA 24h viability | C1     | A2.5   | C1+A2.5 | C5     | A5     | C5+A5   | C1+A5   | C5+A2.5 |
|--------------------------|--------|--------|---------|--------|--------|---------|---------|---------|
| Plate 1                  | 0.8240 | 0.8910 | 0.6910  | 0.7030 | 0.8060 | 0.3257  | 0.3844  | 0.5701  |
| Plate 2                  | 0.8073 | 0.8991 | 0.5894  | 0.6571 | 0.7661 | 0.3268  | 0.3773  | 0.5562  |
| Plate 3                  | 0.7917 | 0.9779 | 0.6605  | 0.7328 | 0.8689 | 0.3260  | 0.4081  | 0.5576  |
| Plate 4                  | 0.8558 | 0.8676 | 0.5981  | 0.6986 | 0.8203 | 0.3333  | 0.4102  | 0.5626  |
| AS + CsA versus CsA (p)  |        |        | 0.001   |        |        | 0.000   | 0.000   | 0.000   |
| AS + CsA versus AS (p)   |        |        | 0.000   |        |        | 0.000   | 0.000   | 0.000   |
| AS and CsA 48h viability | C1     | A2.5   | C1+A2.5 | C5     | A5     | C5+A5   | C1+A5   | C5+A2.5 |
| Plate 1                  | 0.5586 | 0.8018 | 0.1317  | 0.2265 | 0.5124 | 0.0497  | 0.0722  | 0.0462  |
| Plate 2                  | 0.6622 | 0.8648 | 0.1701  | 0.2507 | 0.5612 | 0.0609  | 0.0969  | 0.0656  |
| Plate 3                  | 0.7520 | 0.9438 | 0.1786  | 0.2211 | 0.5440 | 0.0531  | 0.0800  | 0.0593  |
| Plate 4                  | 0.5713 | 0.7807 | 0.1444  | 0.2028 | 0.4882 | 0.0479  | 0.0760  | 0.0551  |
| AS + CsA versus CsA (p)  |        |        | 0.00116 |        |        | 0.00000 | 0.00102 | 0.00000 |
| AS + CsA versus AS (p)   |        |        | 0.00000 |        |        | 0.00000 | 0.00000 | 0.00000 |

**Table S1. Statistical analysis of the differential viability after AS and CsA treatment alone or in combination for 24 or 48 hours in HCT116 cells (see Fig. 1A)**

| Characteristics        | N=90 (%)  |
|------------------------|-----------|
| Age                    |           |
| <70                    | 44 (48.9) |
| ≥70                    | 46 (51.1) |
| Sex                    |           |
| Male                   | 47 (52.2) |
| Female                 | 43 (47.8) |
| Tumor size (cm)        |           |
| ≤5                     | 46 (51.1) |
| >5                     | 42 (46.7) |
| Unknown                | 2 (2.2)   |
| Histologic grade       |           |
| I                      | 8 (8.9)   |
| II                     | 48 (53.3) |
| II-III                 | 28 (31.1) |
| III                    | 6 (6.7)   |
| Lymph Node Involvement |           |
| Negative               | 57 (63.3) |
| Positive               | 33 (36.7) |
| Stage                  |           |
| I                      | 7 (7.8)   |
| II                     | 47 (52.2) |
| III                    | 32 (35.6) |
| IV                     | 2 (2.2)   |
| unknown                | 2 (2.2)   |

**Table S2: Characteristics of 90 colon cancer cases with immunostaining**

|                          | Nuclear NFATc1           |                          | p     |
|--------------------------|--------------------------|--------------------------|-------|
|                          | Negative<br>N=44 (48.9%) | Positive<br>N=46 (51.1%) |       |
| Age                      |                          |                          |       |
| <70                      | 20 (45.5)                | 24 (54.6)                | 0.524 |
| ≥70                      | 24 (52.2)                | 22 (47.8)                |       |
| Sex                      |                          |                          |       |
| Male                     | 24 (51.1)                | 23 (48.9)                | 0.667 |
| Female                   | 20 (46.5)                | 23 (53.5)                |       |
| Tumor size (cm, n=88)    |                          |                          |       |
| ≤5.0                     | 22 (47.8)                | 24 (52.2)                | 0.839 |
| >5.0                     | 21 (50)                  | 21 (50)                  |       |
| Lymph node involvement   |                          |                          |       |
| Negative                 | 31 (54.4)                | 26 (45.6)                | 0.170 |
| Positive                 | 13 (39.4)                | 20 (60.6)                |       |
| Grade                    |                          |                          |       |
| I, I-II, II              | 32 (57.1)                | 24 (42.9)                | 0.044 |
| II-III, III              | 12 (35.3)                | 22 (64.7)                |       |
| Stage (n=88)             |                          |                          |       |
| I and II                 | 29 (53.7)                | 25 (46.3)                | 0.252 |
| III and IV               | 14 (41.2)                | 20 (58.8)                |       |
| Median survival (95% CI) |                          |                          |       |
|                          | 69.8                     | 53.2                     | 0.041 |
|                          | (60.2-79.5)              | (42.9-63.6)              |       |

**Table S3: Characteristics of cases with negative or positive nuclear NFATc1 expression**

|                        | NFATc2 expression      |                        |       | NFATc2-cytoplasmic expression |                          |       |
|------------------------|------------------------|------------------------|-------|-------------------------------|--------------------------|-------|
|                        | Negative<br>N=18 (20%) | Positive<br>N=72 (80%) | p     | Negative<br>N=21 (23.3%)      | Positive<br>N=69 (76.7%) | p     |
| Age                    |                        |                        |       |                               |                          |       |
| <70                    | 7 (15.9)               | 37 (84.1)              | 0.343 | 10 (22.7)                     | 34 (77.3)                | 0.894 |
| ≥70                    | 11 (23.9)              | 35 (76.1)              |       | 11 (23.9)                     | 35 (76.1)                |       |
| Sex                    |                        |                        |       |                               |                          |       |
| Male                   | 10 (21.3)              | 37 (78.7)              | 0.752 | 11 (23.4)                     | 36 (76.6)                | 0.987 |
| Female                 | 8 (18.6)               | 35 (81.4)              |       | 10 (23.3)                     | 33 (76.7)                |       |
| Tumor size (cm, n=88)  |                        |                        |       |                               |                          |       |
| ≤5.0                   | 12 (26.1)              | 34 (73.9)              | 0.170 | 13 (28.26)                    | 33 (71.7)                | 0.311 |
| >5.0                   | 6 (14.3)               | 36 (85.7)              |       | 8 (19.05)                     | 34 (80.9)                |       |
| Lymph node involvement |                        |                        |       |                               |                          |       |
| Negative               | 10 (17.5)              | 47 (82.5)              | 0.444 | 11(19.3)                      | 46 ( 80.7)               | 0.234 |
| Positive               | 8 (24.2)               | 25 (75.8)              |       | 10 (30.3)                     | 23 (69.7)                |       |
| Grade                  |                        |                        |       |                               |                          |       |
| I-II                   | 13 (23.2)              | 43 (76.8)              | 0.328 | 13 (23.2)                     | 41 (76.8)                | 0.704 |
| III                    | 5 (14.7)               | 29 (85.3)              |       | 7 (20.6)                      | 27 (79.4)                |       |
| Stage (n=88)           |                        |                        |       |                               |                          |       |
| I and II               | 10 (18.5)              | 44 (81.5)              | 0.570 | 11(20.4)                      | 43 (79.6)                | 0.333 |
| III and IV             | 8 (23.5)               | 26 (76.5)              |       | 10 (29.4)                     | 24 (70.6)                |       |
| Median survival        |                        |                        |       |                               |                          |       |
|                        | 49.4<br>(35.5-63.4)    | 64.5<br>(56.2-72.8)    | 0.048 | 44.8<br>(31.7-57.8)           | 66.6<br>(58.2-74.9)      | 0.005 |

**Table S4: Characteristics of cases with positive or negative total or cytoplasmic only NFATc2 expression.**

| Covariant        | Univariate analysis |             |       | Multivariate analysis |             |       |
|------------------|---------------------|-------------|-------|-----------------------|-------------|-------|
|                  | HR                  | 95% CI      | P     | HR                    | 95% CI      | P     |
| Age              | 1.887               | 1.055-3.376 | 0.031 | 2.024                 | 1.125-3.641 | 0.018 |
| Stage            | 2.533               | 1.438-4.459 | 0.001 | 2.510                 | 1.414-4.456 | 0.002 |
| NFATc1-nuclear   | 1.838               | 1.037-3.257 | 0.041 | 1.931                 | 1.082-3.445 | 0.030 |
| NFATc2-cytoplasm | 0.456               | 0.253-0.823 | 0.009 | 0.535                 | 0.295-0.970 | 0.041 |
| Sex              | 0.782               | 0.444-1.379 | 0.415 |                       |             |       |
| Grade            | 1.436               | 0.812-2.541 | 0.220 |                       |             |       |
| NFATc1-cytoplasm | 0.699               | 0.385-1.270 | 0.224 |                       |             |       |
| NFATc2-nuclear   | 1.284               | 0.706-2.336 | 0.428 |                       |             |       |

**Table S5. Univariate and multivariate analysis of overall survival by the impact of age, stage, sex, grade, NFATc1 and c2 expression.** Univariate and multivariate analysis of age, stage, NFATc1 nuclear expression, NFATc2-cytoplasmic expression, sex, histologic grade, NFATc1 cytoplasmic expression and NFATc2 nuclear expression of 88 cases(excluding 2 cases with unknown stage information). After multivariate analysis, NFATc1 nuclear expression remains significantly associated with worse patient survival, while NFATc2 cytoplasmic expression remains significantly associated with better survival. HR, hazardous ratio. CI, confidence interval.
